# Supplementary material for: From Understanding to Appreciating Music Cross-Culturally
Source: PubMed Central journal article supplement (PMC3762814; doi:10.1371/journal.pone.0072500), 2013-09-04
Supplement: pone.0072500.s001.pdf [file pone.0072500.s001.pdf]

Supplementary tables listing all the word triplets presented in German, Mafa (using the International Phonetic alphabet IPA), and an English translation.

Table S1.

## English

| sound       | word 1     | word 2      | word 3      |
|-------------|------------|-------------|-------------|
| peace       | storm      | quarrel     | peace       |
| Bird        | bird       | bull        | longing     |
| wideness    | strait     | mockery     | wideness    |
| celebration | fight      | celebration | stream      |
| longing     | longing    | race        | king        |
| King        | king       | needle      | bird        |
| mockery     | rain       | mockery     | joy         |
| Bull        | bird       | bull        | poison      |
| hope        | impatience | hope        | fire        |
| strait      | wideness   | hero        | strait      |
| flight      | dance      | sun         | flight      |
| hero        | poison     | loneliness  | hero        |
| needle      | king       | arrival     | needle      |
| loneliness  | fire       | loneliness  | celebration |
| fight       | fight      | celebration | grief       |
| storm       | peace      | storm       | needle      |
| arrival     | farewell   | impatience  | arrival     |
| Rain        | rain       | mockery     | men         |
| stream      | stream     | threat      | race        |
| water       | water      | sun         | dance       |
| farewell    | arrival    | flight      | farewell    |
| poison      | hero       | poison      | women       |
| men         | women      | men         | glass       |
| dance       | dance      | flight      | morning     |
| glass       | morning    | glass       | storm       |
| women       | men        | strait      | women       |
| Sun         | water      | sun         | threat      |
| Fire        | loneliness | farewell    | fire        |
| race        | race       | longing     | water       |
| threat      | stream     | threat      | hope        |
| quarrel     | prayer     | peace       | quarrel     |
| morning     | morning    | glass       | fight       |
| prayer      | quarrel    | wideness    | prayer      |

Table S2.

**Mafa**

| sound                 | word 1                | word 2                | word 3              |
|-----------------------|-----------------------|-----------------------|---------------------|
| [pam'bai]             | [n'tombɔn'dɔ]         | [ysa'ɔn]              | [pam'bai]           |
| ['biak]               | ['biak]               | [ma'rai]              | ['ski:ma'nangakie]  |
| [nhɸu'aa]             | ['yxee]               | [ngwe'fe am'da]       | [nhɸu'aa]           |
| ['ægwala'la]          | [ɛ'gijobi:]           | ['ægwala'la]          | [vwei'jɪ]           |
| ['ski:ma'nangakie]    | ['ski:ma'nangakie]    | [æ'xi]                | ['bi:]              |
| ['bi:]                | ['bi:]                | [le'pɛr]              | ['biak]             |
| [ngwe'fe am'da]       | [jɸmi'z'gɛ]           | [ngwe'fe am'da]       | ['ngfe]             |
| [ma'rai]              | ['biak]               | [ma'rai]              | [n'dɛre]            |
| [i'zɛrskwai]          | ungeduld              | [i'zɛrskwai]          | [vɔ'bwap]           |
| ['yxee]               | [nhɸu'aa]             | [n'do saje'daɸ]       | ['yxee]             |
| [n'mandɛdʒɪmɛ'e]      | [yge'tfe]             | ['bats]               | [n'mandɛdʒɪmɛ'e]    |
| [n'do saje'daɸ]       | [n'dɛre]              | [noma'na nsa'a agn'e] | [n'do saje'daɸ]     |
| [le'pɛr]              | ['bi:]                | ['yndike]             | [le'pɛr]            |
| [noma'na nsa'a agn'e] | [vɔ'bwap]             | [noma'na nsa'a agn'e] | ['ægwala'la]        |
| [ɛ'gijobi:]           | [ɛ'gijobi:]           | ['ægwala'la]          | [nlaɪ'e]            |
| [n'tombɔn'dɔ]         | [pam'bai]             | [n'tombɔn'dɔ]         | [le'pɛr]            |
| ['yndike]             | [n'de]                | [ha'fɛɛɛtipa 'i]      | ['yndike]           |
| [jɸmi'z'gɛ]           | [jɸmi'z'gɛ]           | [ngwe'fe am'da]       | ['ɛgura]            |
| [vwei'jɪ]             | [vwei'jɪ]             | ['skujɪr ʊs 'i:tba]   | [æ'xi]              |
| ['jɸm]                | ['jɸm]                | ['bats]               | [yge'tfe]           |
| [n'de]                | ['yndike]             | [n'mandɛdʒɪmɛ'e]      | [n'de]              |
| [n'dɛre]              | [n'do saje'daɸ]       | [n'dɛre]              | [n'gɔz]             |
| ['ɛgura]              | [n'gɔz]               | ['ɛgura]              | [gwala'ba]          |
| [yge'tfe]             | [yge'tfe]             | [n'mandɛdʒɪmɛ'e]      | ['prɛk]             |
| [gwala'ba]            | ['prɛk]               | [gwala'ba]            | [n'tombɔn'dɔ]       |
| [n'gɔz]               | ['ɛgura]              | ['yxee]               | [n'gɔz]             |
| ['bats]               | ['jɸm]                | ['bats]               | ['skujɪr ʊs 'i:tba] |
| [vɔ'bwap]             | [noma'na nsa'a agn'e] | [n'de]                | [vɔ'bwap]           |
| [æ'xi]                | [æ'xi]                | ['ski:ma'nangakie]    | ['jɸm]              |
| ['skujɪr ʊs 'i:tba]   | [vwei'jɪ]             | ['skujɪr ʊs 'i:tba]   | [i'zɛrskwai]        |
| [ysa'ɔn]              | [ɪtser'i:]            | [pam'bai]             | [ysa'ɔn]            |
| ['prɛk]               | ['prɛk]               | [gwala'ba]            | [ɛ'gijobi:]         |
| [ɪtser'i:]            | [ysa'ɔn]              | [nhɸu'aa]             | [ɪtser'i:]          |

Table S3.

**German**

| Sound      | word 1     | word 2     | word 3    |
|------------|------------|------------|-----------|
| Frieden    | Sturm      | Streit     | Frieden   |
| Vogel      | Vogel      | Stier      | Sehnsucht |
| Weite      | Enge       | Spott      | Weite     |
| Fest       | Kampf      | Fest       | Bach      |
| Sehnsucht  | Sehnsucht  | Rennen     | Koenig    |
| Koenig     | Koenig     | Nadel      | Vogel     |
| Spott      | Regen      | Spott      | Freude    |
| Stier      | Vogel      | Stier      | Gift      |
| Hoffnung   | Ungeduld   | Hoffnung   | Feuer     |
| Enge       | Weite      | Held       | Enge      |
| Flucht     | Tanz       | Sonne      | Flucht    |
| Held       | Gift       | Einsamkeit | Held      |
| Nadel      | Koenig     | Ankunft    | Nadel     |
| Einsamkeit | Feuer      | Einsamkeit | Fest      |
| Kampf      | Kampf      | Fest       | Trauer    |
| Sturm      | Frieden    | Sturm      | Nadel     |
| Ankunft    | Abschied   | Ungeduld   | Ankunft   |
| Regen      | Regen      | Spott      | Maenner   |
| Bach       | Bach       | Bedrohung  | Rennen    |
| Wasser     | Wasser     | Sonne      | Tanz      |
| Abschied   | Ankunft    | Flucht     | Abschied  |
| Gift       | Held       | Gift       | Frauen    |
| Maenner    | Frauen     | Maenner    | Glas      |
| Tanz       | Tanz       | Flucht     | Morgen    |
| Glas       | Morgen     | Glas       | Sturm     |
| Frauen     | Maenner    | Enge       | Frauen    |
| Sonne      | Wasser     | Sonne      | Bedrohung |
| Feuer      | Einsamkeit | Abschied   | Feuer     |
| Rennen     | Rennen     | Sehnsucht  | Wasser    |
| Bedrohung  | Bach       | Bedrohung  | Hoffnung  |
| Streit     | Gebet      | Frieden    | Streit    |
| Morgen     | Morgen     | Glas       | Kampf     |
| Gebet      | Streit     | Weite      | Gebet     |
